# Supplementary material for: Sea-shell-like B31+and B32: two new axially chiral members of the borospherene family
Source: Royal Society of Chemistry journal article supplement (doi:10.1039/d0ra01087a), 2020-01-01
Supplement: d0ra01087a1.pdf [file d0ra01087a1.pdf]

## Supporting Information

### Sea-shell-like $B_{31}^+$ and $B_{32}$ : two new axially chiral members of the borospherene family

Ling Pei,<sup>a,b</sup> Miao Yan,<sup>a</sup> Xiao-Yun Zhao,<sup>a</sup> Yue-Wen Mu,<sup>a</sup> Hai-Gang Lu,<sup>a</sup> Yan-Bo Wu,<sup>a</sup> Si-Dian Li\*<sup>a</sup>

Fig.S1 Low-lying isomers of  $B_{31}^+$  (a) and  $B_{32}$  (b), along with their relative energies indicated in eV at PBE0/6-311+G(d), TPSSh/6-311+G(d) (in parentheses), and CCSD(T)/6-311G(d)//PBE0/6-311+G(d) (in square brackets) levels. The energies are corrected for zero-point energies.

Fig.S2 Born-Oppenheimer molecular dynamics simulations of  $C_2 B_{31}^+$  (c) and  $C_2 B_{32}$  (d) at 500K, 700K and 1000K for 30 ps. The root-mean-square-deviation (RMSD) and maximum bond length deviation (MAXD) values (on average) are indicated in Å.

Fig. S3  $\sigma$  and  $\pi$  AdNDP bonding patterns of  $C_s B_{32}$  (VII), with the occupation numbers (ONs) indicated.

Table S1 Optimized cartesian coordinates of the GM structures of  $B_{31}^+$  and  $B_{32}$  at PBE0/6-311+G(d)

Fig.S1 Low-lying isomers of  $B_{31}^+$  (a) and  $B_{32}$  (b), along with their relative energies indicated in eV at PBE0/6-311+G(d), TPSSh/6-311+G(d) (in parentheses), and CCSD(T)/6-311G(d)//PBE0/6-311+G(d) levels. The energies are corrected for zero-point energies.

(a)  $B_{31}^+$

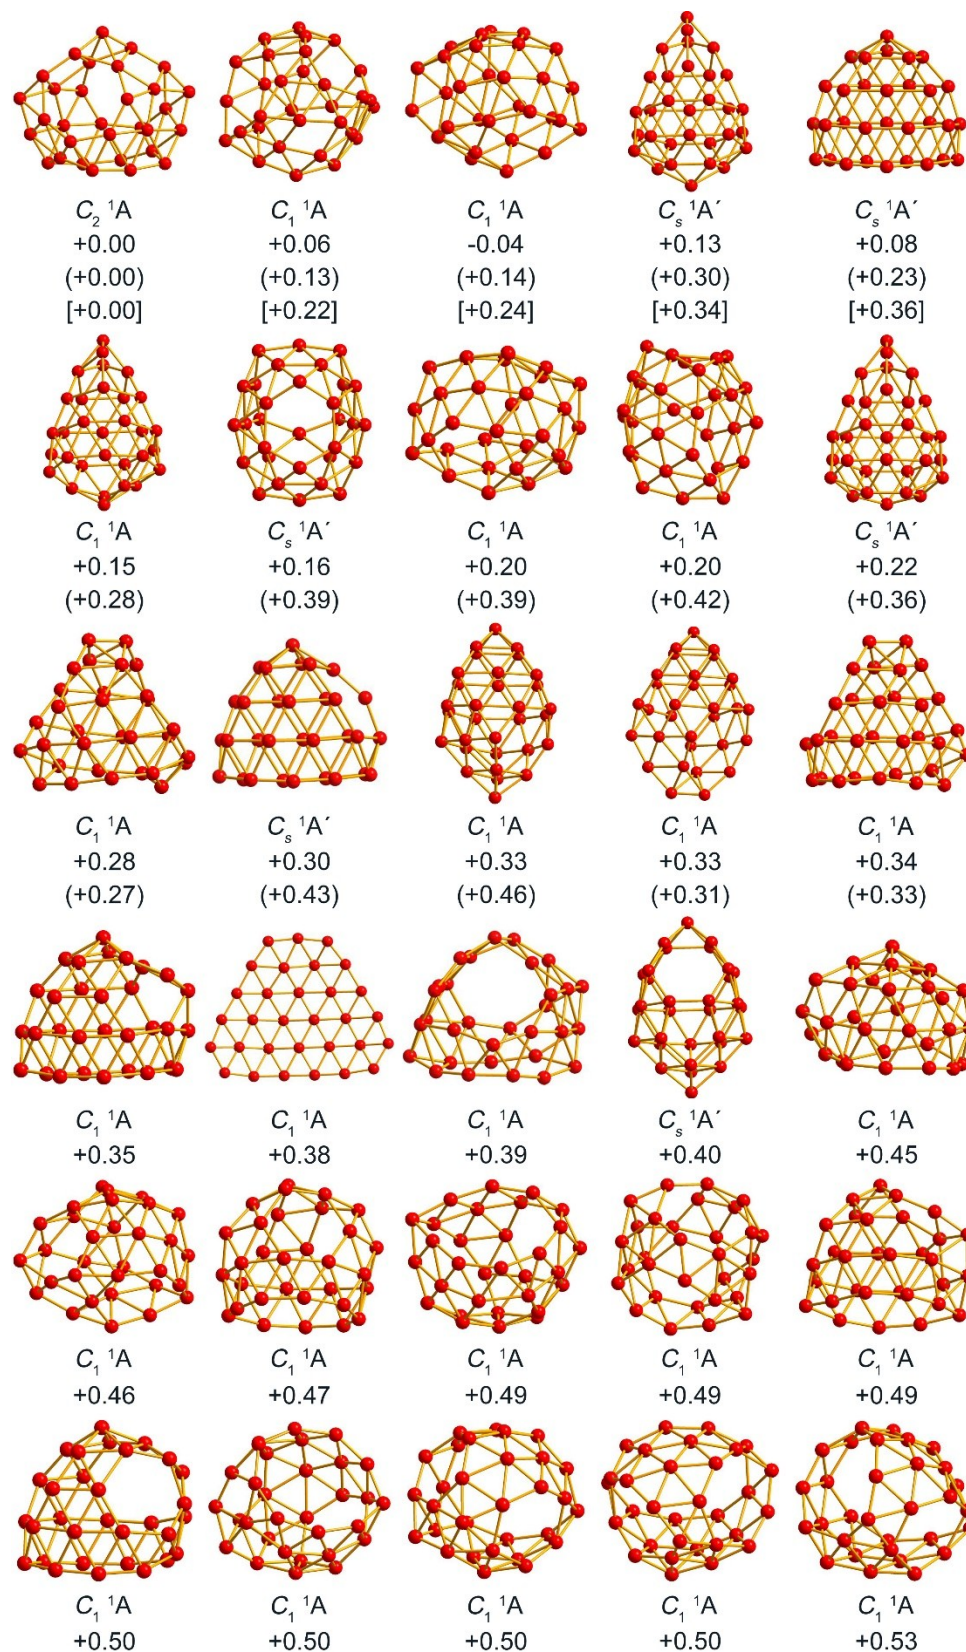

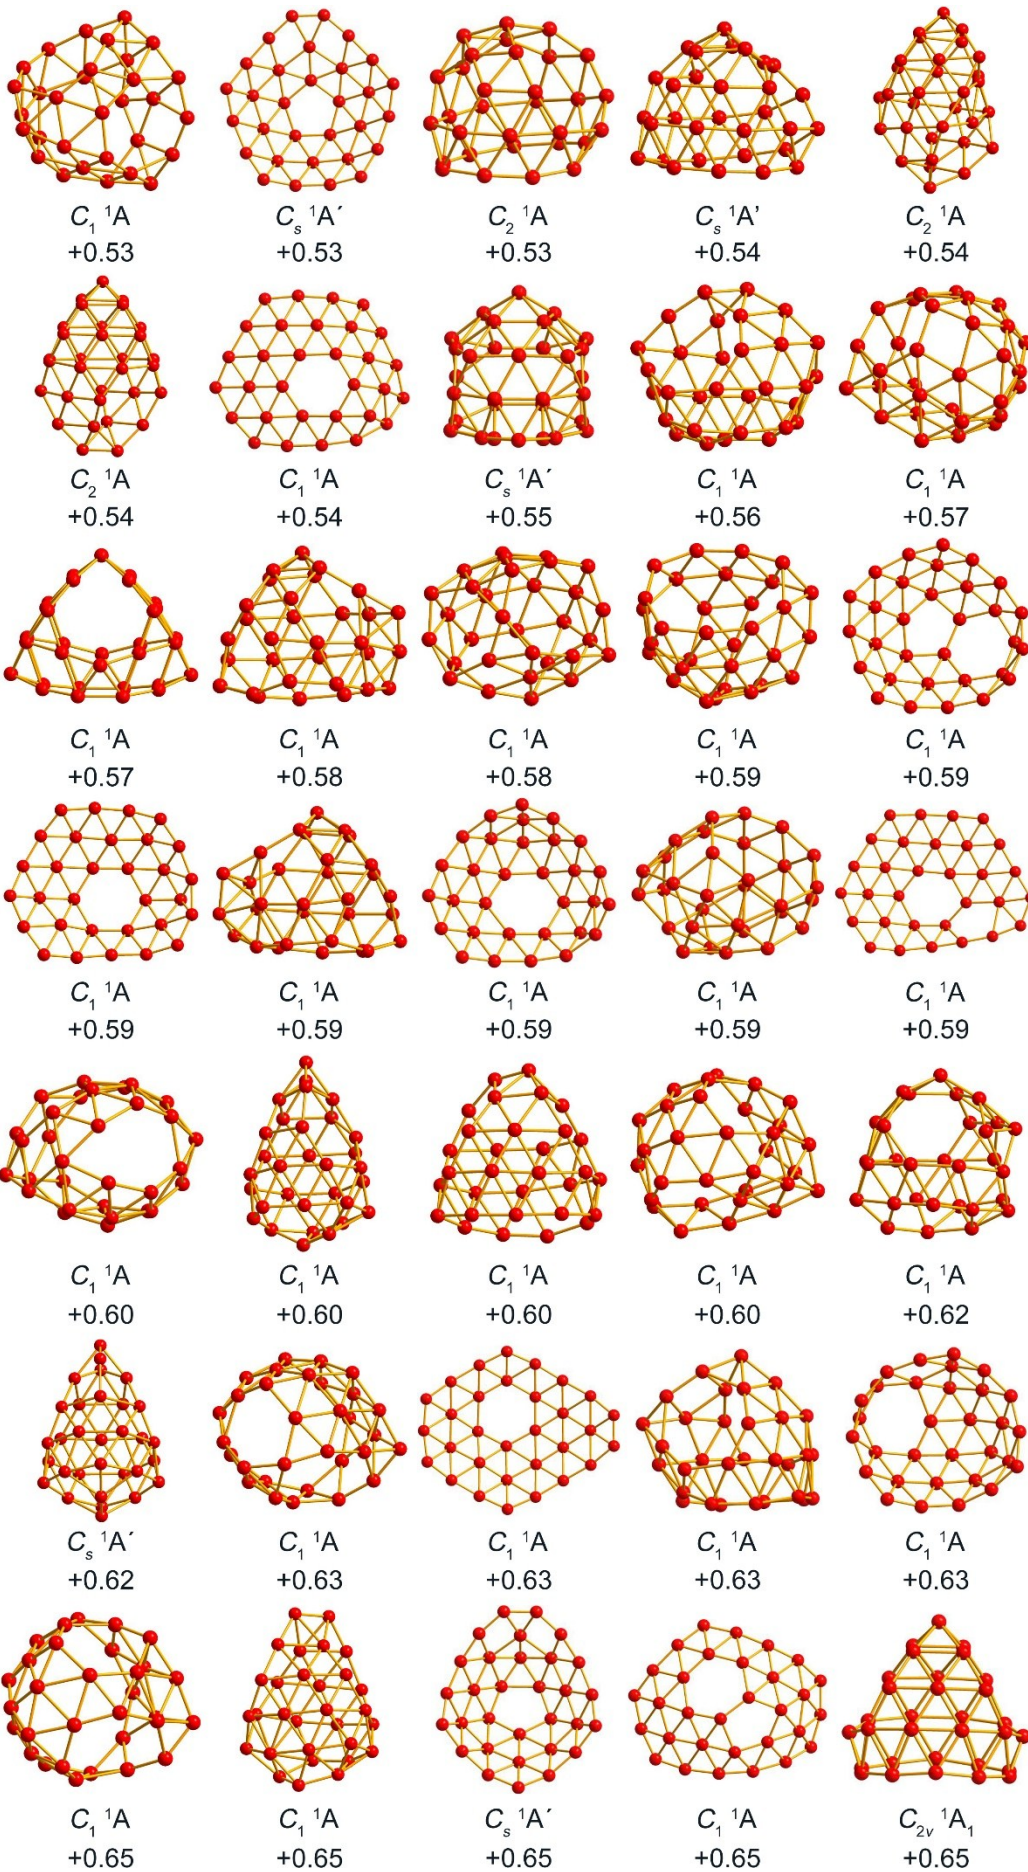

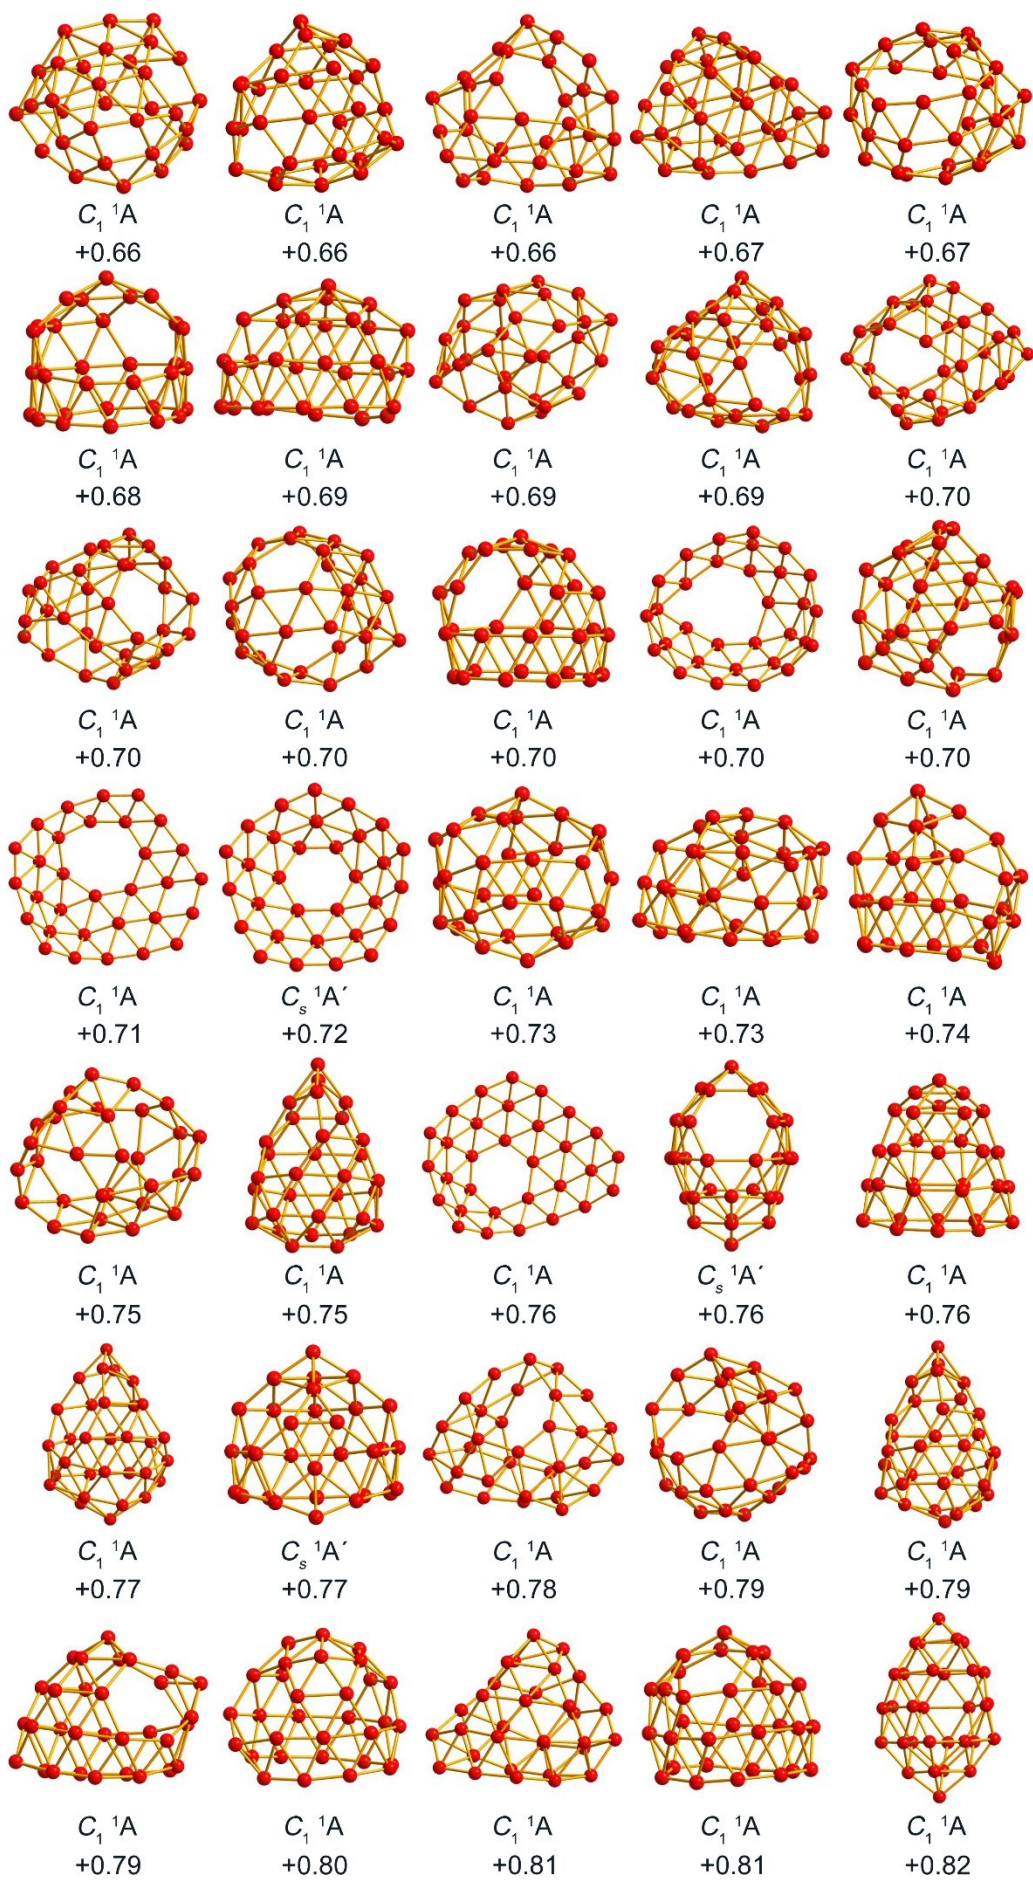

(b) B<sub>32</sub>

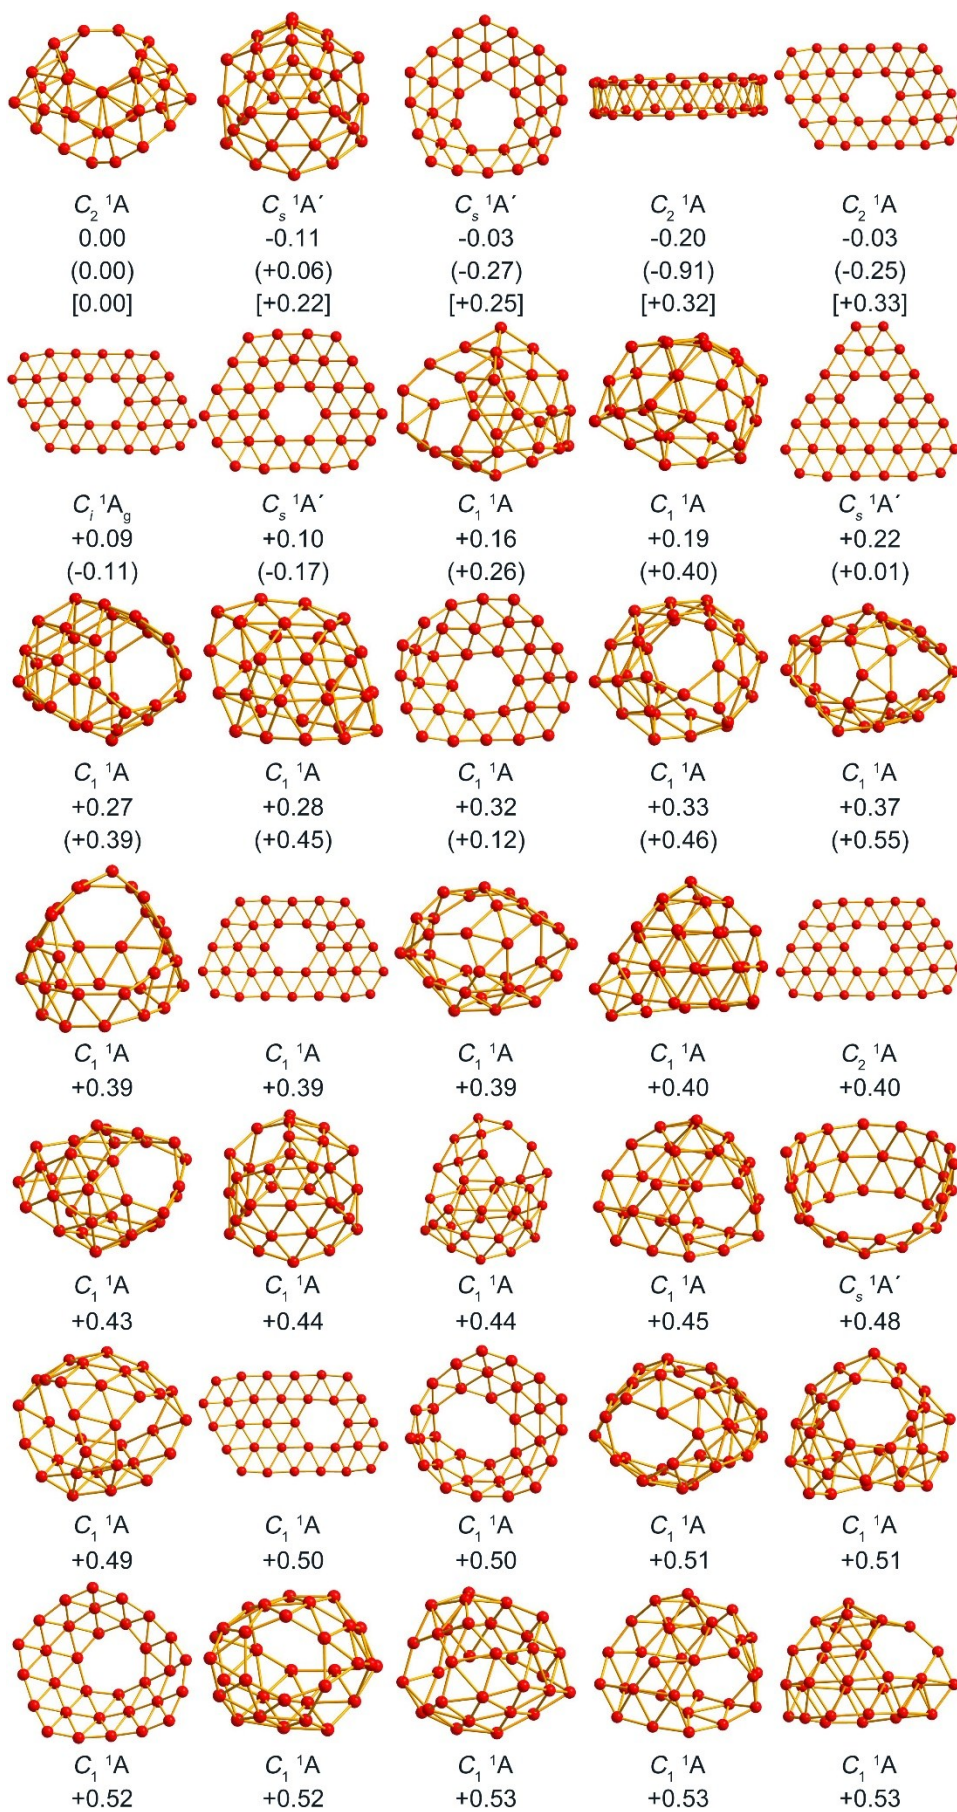

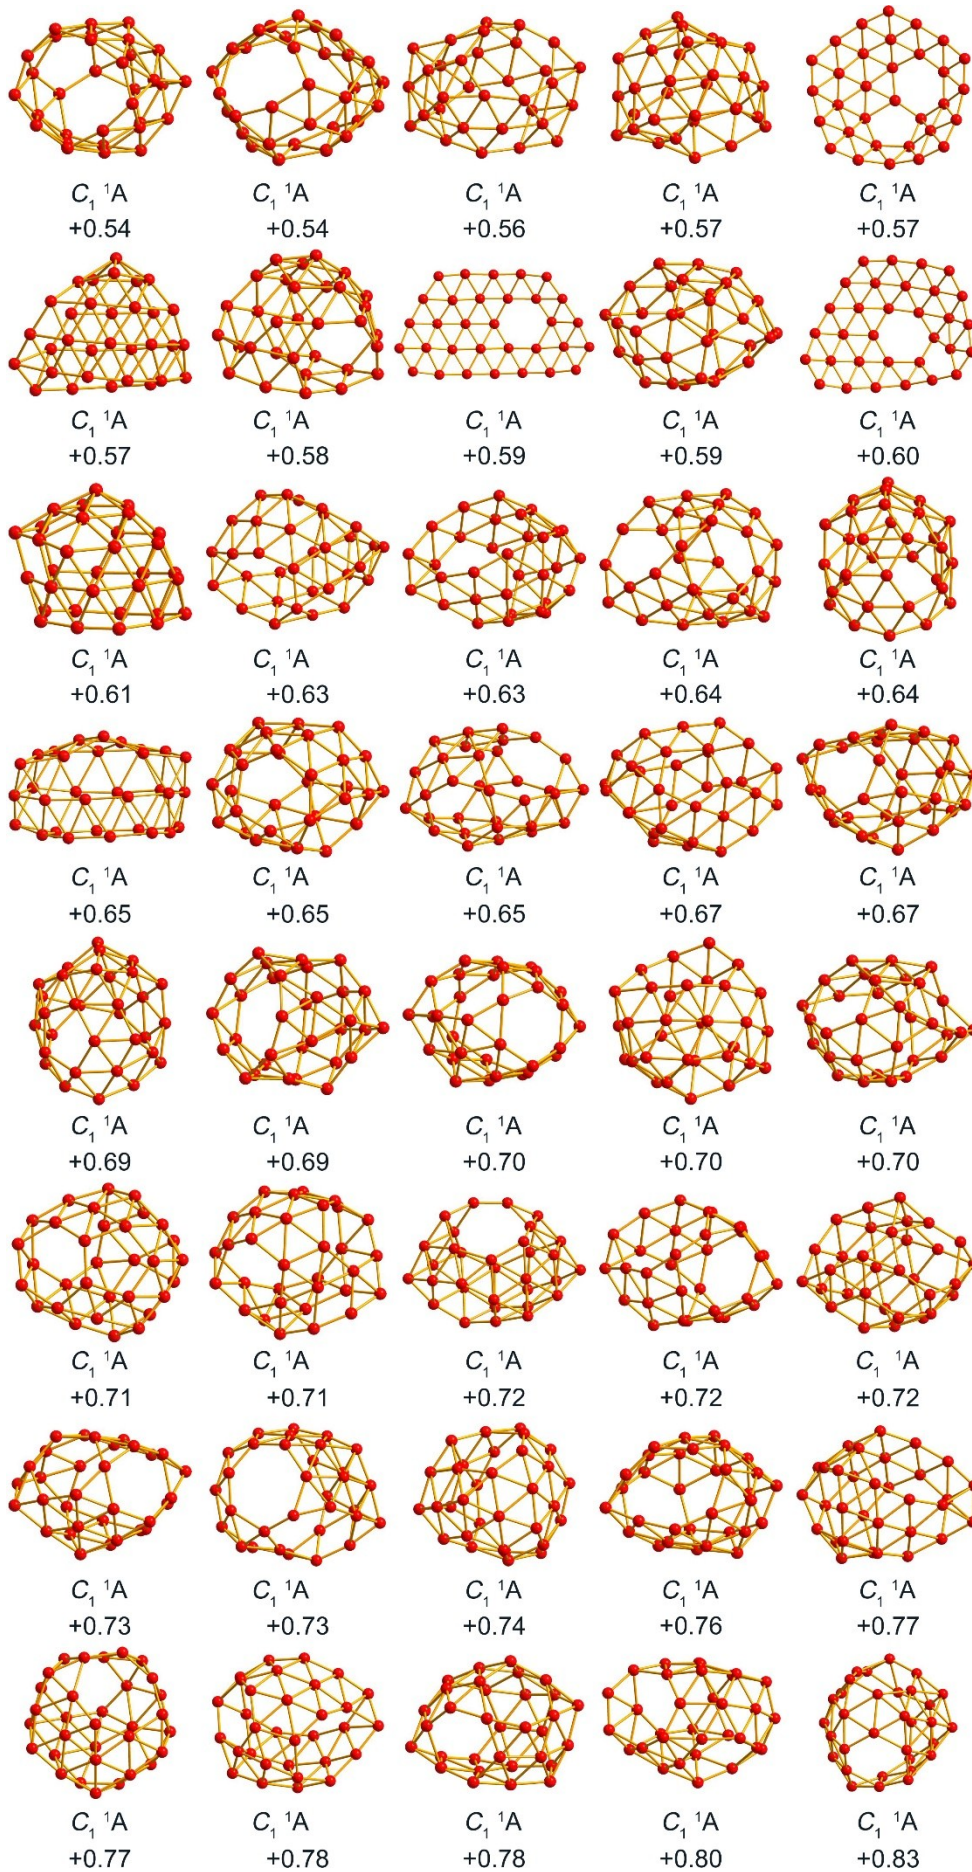

Fig.S2 Born-Oppenheimer molecular dynamics simulations of  $C_2 B_{31}^+$  (a) and  $C_2 B_{32}$  (b) at 500K, 700K and 1000K for 30 ps. The root-mean-square-deviation (RMSD) and maximum bond length deviation (MAXD) values (on average) are indicated in Å.

(a)  $C_2 B_{31}^+$

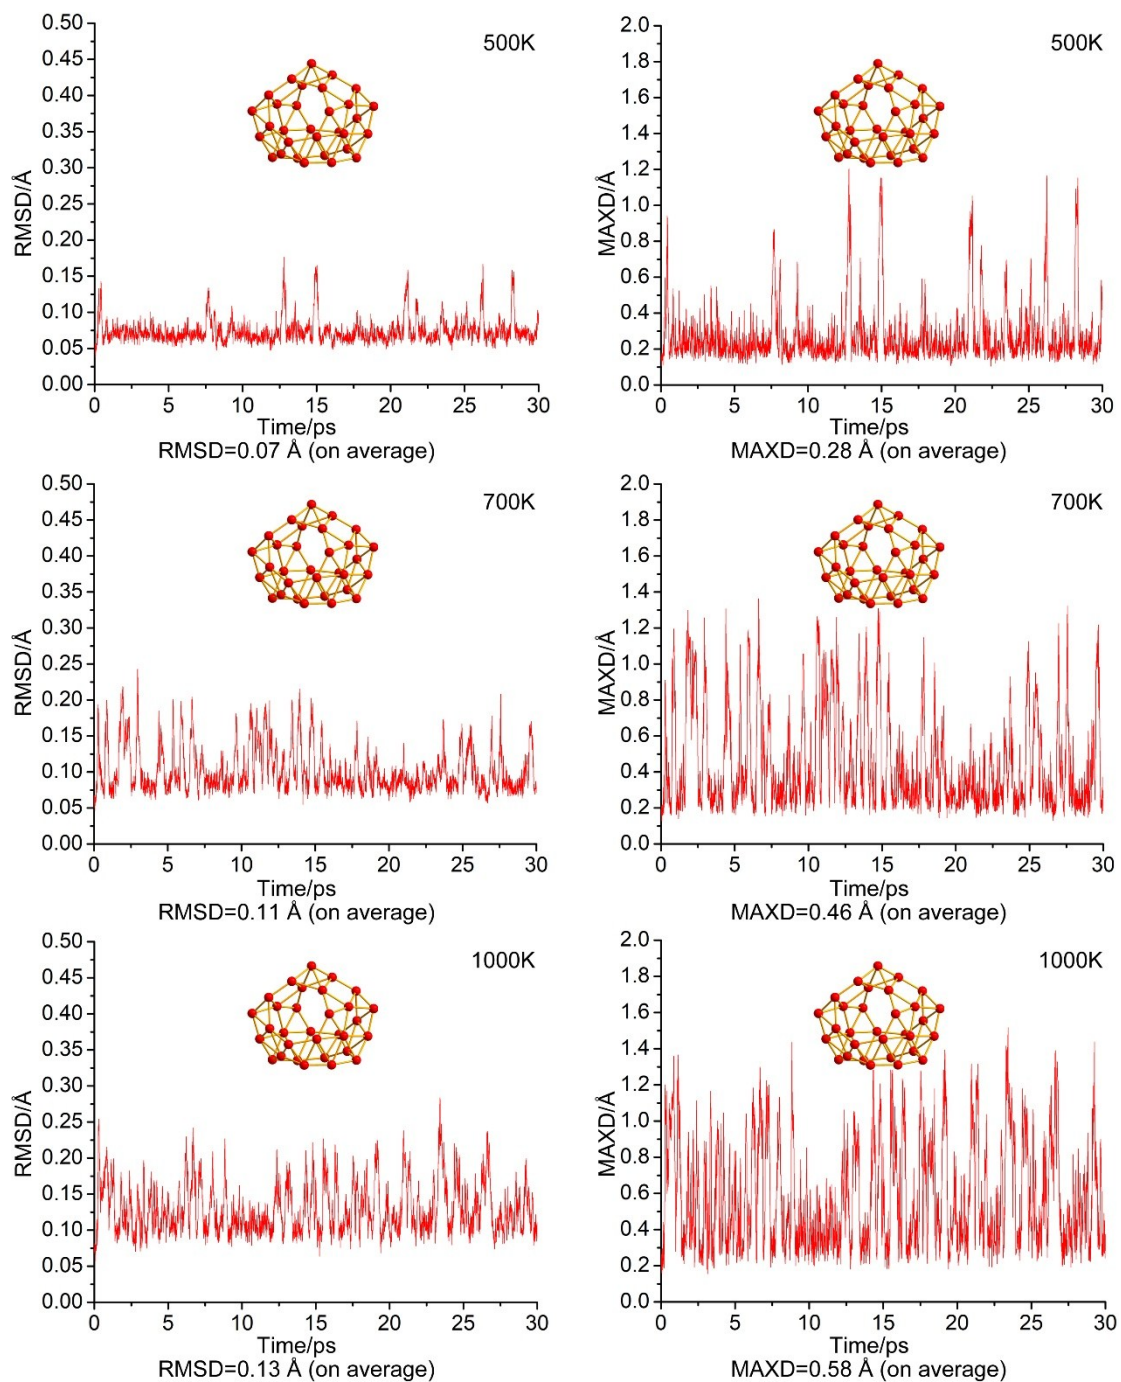

(b)  $C_2 B_{32}$

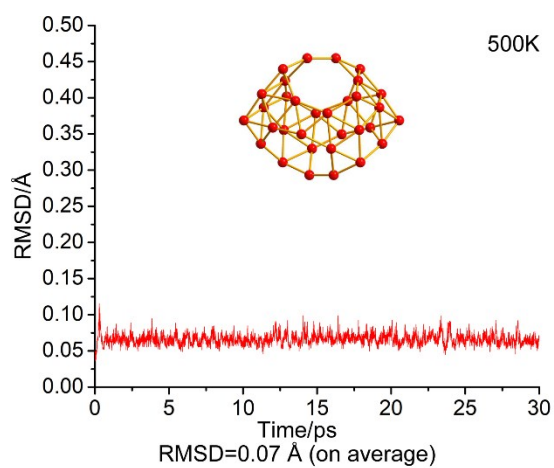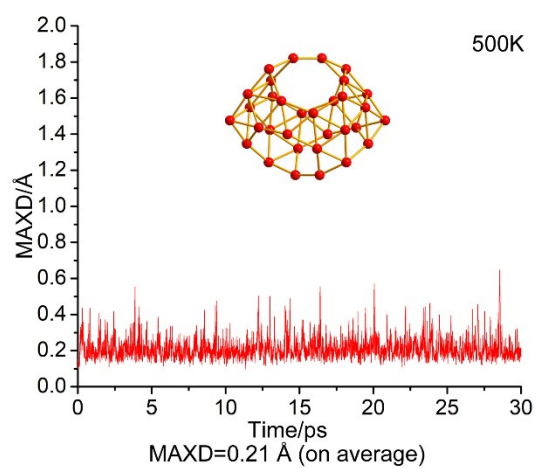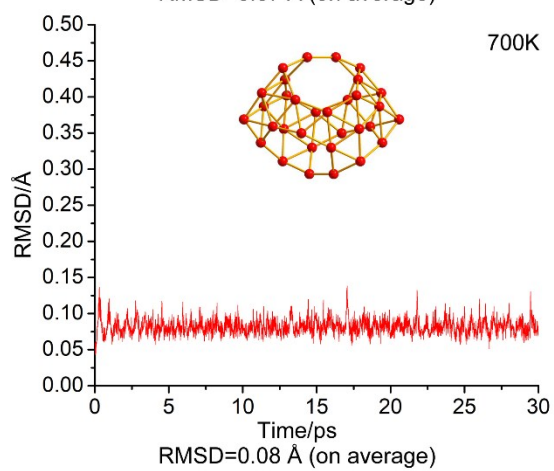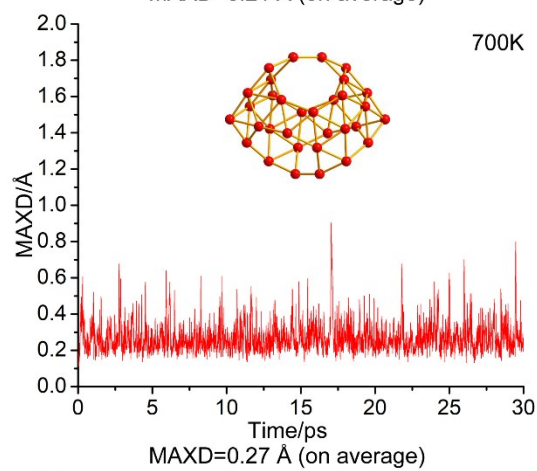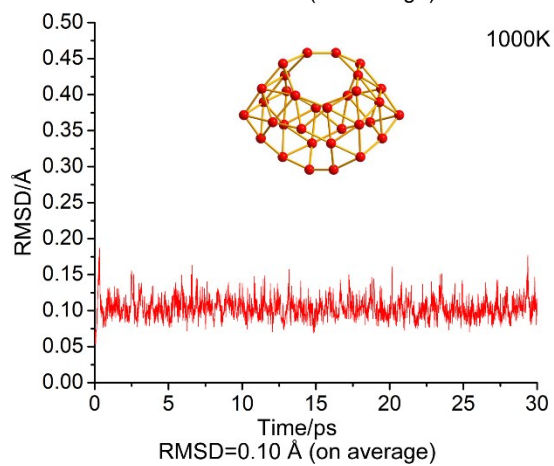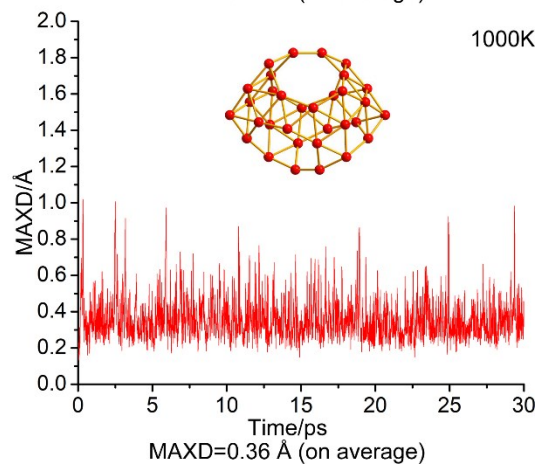



Fig. S3  $\sigma$  and  $\pi$  AdNDP bonding patterns of  $C_s$   $B_{32}$  (VII), with the occupation numbers (ONs) indicated.

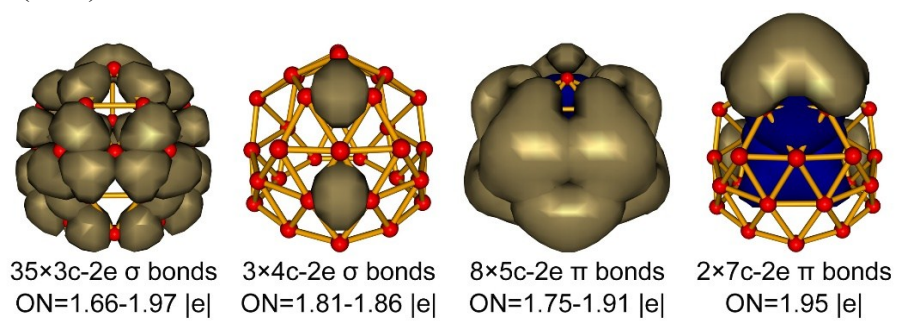

Table S1 Optimized cartesian coordinates of the GM structures of  $B_{31}^+$  and  $B_{32}$  at PBE0/6-311+G(d)

1.  $C_2 B_{31}^+$

|   |             |             |             |
|---|-------------|-------------|-------------|
| B | -1.88265100 | 0.84149000  | -0.61297700 |
| B | -1.23583500 | 2.34274400  | -0.84656300 |
| B | 1.04759800  | 0.08582100  | 2.05691600  |
| B | -1.25600900 | 1.36700600  | -2.10904800 |
| B | 1.85263300  | 1.72351000  | -2.02279500 |
| B | 1.23583500  | -2.34274400 | -0.84656300 |
| B | -0.23383800 | -2.03425600 | -1.66756000 |
| B | 1.25600900  | -1.36700600 | -2.10904800 |
| B | 1.72009700  | 0.16416000  | -2.18178100 |
| B | 1.61518400  | 2.63926400  | -0.73907300 |
| B | 0.35920600  | 2.65837700  | 1.75516700  |
| B | 0.00000000  | 2.85425400  | 0.00141400  |
| B | 1.58053200  | 1.47097100  | 1.04460400  |
| B | 1.99250200  | 0.85882700  | -0.55731700 |
| B | 1.44478100  | 3.17331100  | 0.78737700  |
| B | -2.04785500 | 0.06398100  | 0.79355600  |
| B | 1.88265100  | -0.84149000 | -0.61297700 |
| B | 0.00000000  | -2.85425400 | 0.00141400  |
| B | -1.85263300 | -1.72351000 | -2.02279500 |
| B | 0.23383800  | 2.03425600  | -1.66756000 |
| B | -1.72009700 | -0.16416000 | -2.18178100 |
| B | -0.35920600 | -2.65837700 | 1.75516700  |
| B | -0.08757500 | 1.37087400  | 2.61018900  |
| B | -1.61518400 | -2.63926400 | -0.73907300 |
| B | -1.99250200 | -0.85882700 | -0.55731700 |
| B | -1.58053200 | -1.47097100 | 1.04460400  |
| B | -1.44478100 | -3.17331100 | 0.78737700  |
| B | -1.04759800 | -0.08582100 | 2.05691600  |
| B | 0.08757500  | -1.37087400 | 2.61018900  |
| B | 2.04785500  | -0.06398100 | 0.79355600  |
| B | 0.00000000  | 0.00000000  | 3.37578000  |

2.  $C_2 B_{32}$

|   |             |             |             |
|---|-------------|-------------|-------------|
| B | -1.21140200 | 1.89639800  | 2.32158200  |
| B | -1.81198000 | -1.70956800 | 0.97782200  |
| B | 1.24310500  | -2.39542800 | -0.54834700 |
| B | -0.38349800 | 0.70519800  | 2.85201600  |
| B | 1.95187100  | 0.27981900  | 0.15532200  |
| B | -1.60991000 | -0.46586200 | -1.58631900 |
| B | -0.52354600 | -0.59548300 | -2.87848700 |
| B | -0.91400200 | 2.93418600  | 1.09567500  |

|   |             |             |             |
|---|-------------|-------------|-------------|
| B | -0.40123100 | 3.81366900  | -0.19811100 |
| B | 0.79495600  | 2.83856900  | 0.43663700  |
| B | 0.40123100  | -3.81366900 | -0.19811100 |
| B | 1.81198000  | 1.70956800  | 0.97782200  |
| B | 1.63361200  | -1.28840000 | 0.75860000  |
| B | 1.60991000  | 0.46586200  | -1.58631900 |
| B | 1.21140200  | -1.89639800 | 2.32158200  |
| B | -0.40123100 | -1.79546100 | 1.75140200  |
| B | 1.65607000  | 1.84967900  | -0.66595100 |
| B | 1.15684900  | 1.90680400  | -2.25473200 |
| B | 0.38349800  | -0.70519800 | 2.85201600  |
| B | 0.40123100  | 1.79546100  | 1.75140200  |
| B | -1.63361200 | 1.28840000  | 0.75860000  |
| B | -1.15684900 | -1.90680400 | -2.25473200 |
| B | -0.79495600 | -2.83856900 | 0.43663700  |
| B | 0.27395400  | 2.98247900  | -1.34049600 |
| B | -1.65607000 | -1.84967900 | -0.66595100 |
| B | -1.86330500 | 0.99269700  | -0.87661400 |
| B | -1.24310500 | 2.39542800  | -0.54834700 |
| B | -1.95187100 | -0.27981900 | 0.15532200  |
| B | 1.86330500  | -0.99269700 | -0.87661400 |
| B | 0.52354600  | 0.59548300  | -2.87848700 |
| B | -0.27395400 | -2.98247900 | -1.34049600 |
| B | 0.91400200  | -2.93418600 | 1.09567500  |
